# Supplementary material for: Zero-profile implant versus conventional cage–plate construct in anterior cervical discectomy and fusion for the treatment of single-level degenerative cervical spondylosis: a systematic review and meta-analysis
Source: PubMed Central journal article supplement (PMC9694547; doi:10.1186/s13018-022-03387-9), 2022-11-24
Supplement: 13018_2022_3387_MOESM1_ESM.pdf [file 13018_2022_3387_MOESM1_ESM.pdf]

A

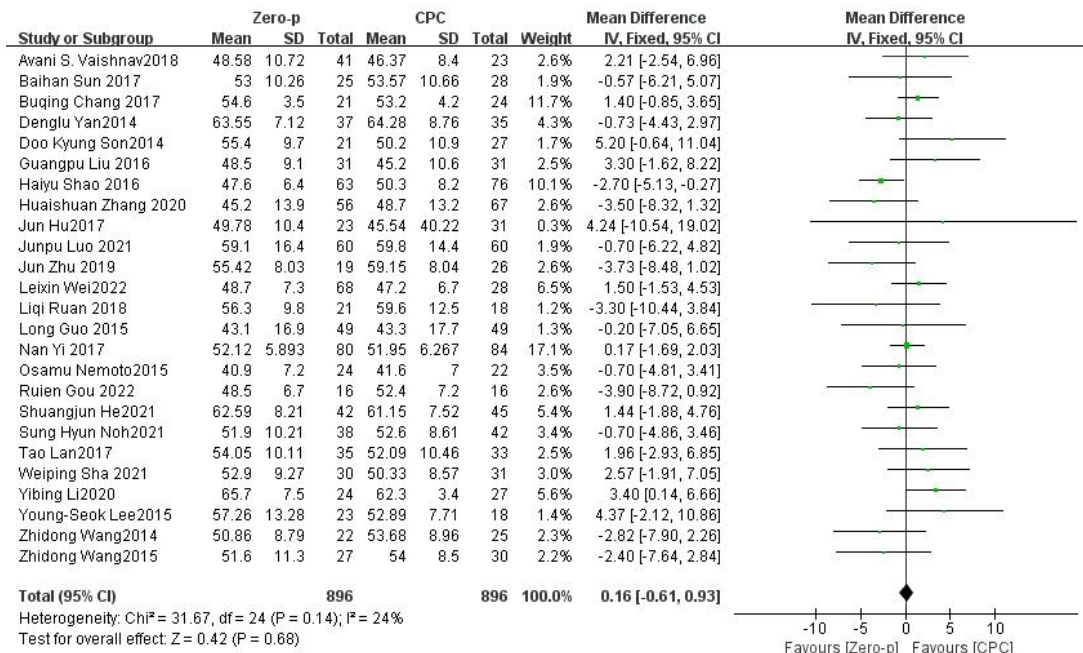

Supplementary material. 1 A Meta-analysis of Zero-p group versus CCP group in age

B

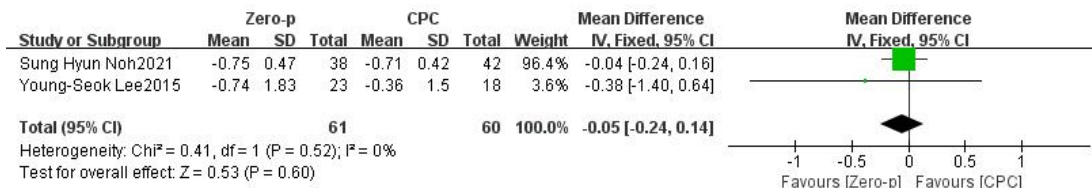

Supplementary material. 1 B Meta-analysis of Zero-p group versus CCP group in BMD

C

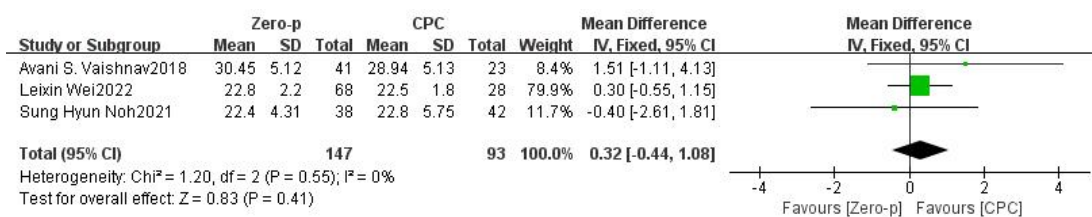

Supplementary material. 1 C Meta-analysis of Zero-p group versus CCP group in BMI

D

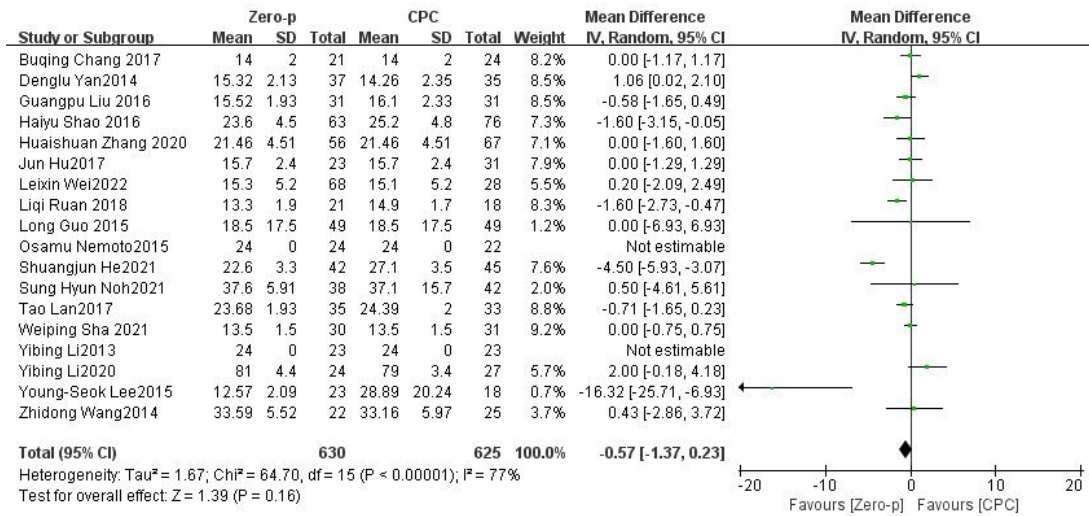

Supplementary material. 1 D Meta-analysis of Zero-p group versus CCP group in follow-up time
