# Supplementary material for: Zero-profile implant versus conventional cage–plate construct in anterior cervical discectomy and fusion for the treatment of single-level degenerative cervical spondylosis: a systematic review and meta-analysis
Source: PubMed Central journal article supplement (PMC9694547; doi:10.1186/s13018-022-03387-9), 2022-11-24
Supplement: 13018_2022_3387_MOESM3_ESM.pdf [file 13018_2022_3387_MOESM3_ESM.pdf]

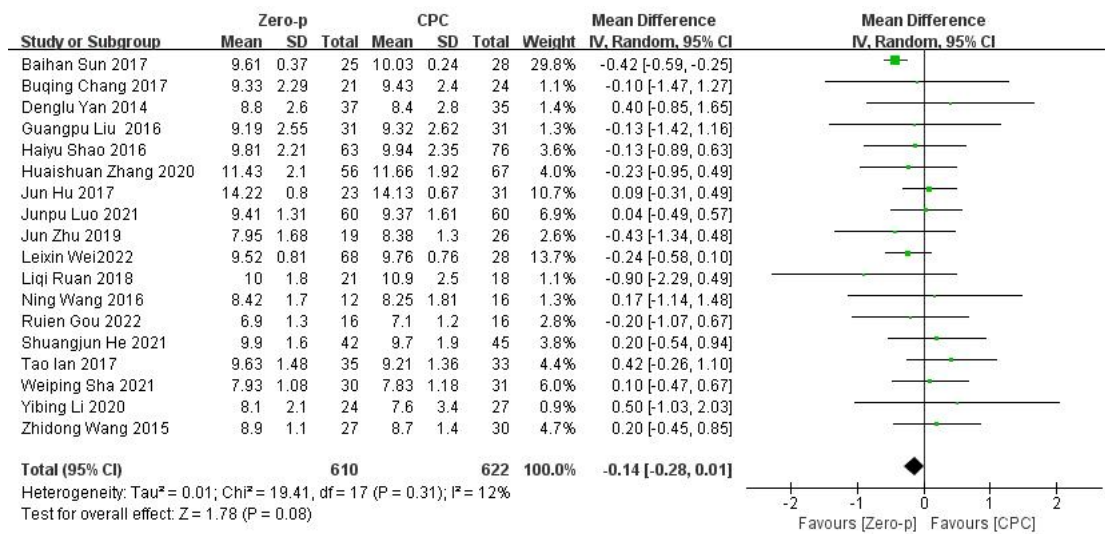

**Supplementary material. 3** Meta-analysis of Zero-p group versus CCP group in preoperative JOA score
